# Supplementary material
Source: PubMed Central journal article supplement (PMC8796200)
Supplement: NIHMS1648012-supplement-Supp_Tables_1-4.pdf [file NIHMS1648012-supplement-Supp_Tables_1-4.pdf]

**Supplementary Table 1.** Included Studies Reporting NAFLD Prevalence Among Population-Based Studies

| Study                                | Country | Study design                        | Study sample                                         | Baseline population excluded alcohol use           | Baseline population excluded viral hepatitis | NAFLD diagnosis method                     | Overall, n | Women/ men, n | Age, mean, median, or range, y                    | BMI, mean, $kg/m^2$ | IGT or type 2 DM, % | NAFLD overall, n | NAFLD in women /men, n | NAFLD prevalence, % |
|--------------------------------------|---------|-------------------------------------|------------------------------------------------------|----------------------------------------------------|----------------------------------------------|--------------------------------------------|------------|---------------|---------------------------------------------------|---------------------|---------------------|------------------|------------------------|---------------------|
| Chen et al, <sup>1</sup> 2006        | Taiwan  | Prospective data, cross-sectional   | Shengang Township                                    | Yes, $\geq 30$ g/d in men; $\geq 20$ g/d in women  | Yes                                          | US                                         | 2520       | 1378/1142     | 51                                                | NR                  | 16                  | 372              | 148/224                | 15                  |
| Zelber-Sagi et al, <sup>2</sup> 2007 | Israel  | Retrospective data, cross-sectional | First Israeli National Health and Nutrition Survey   | Yes, $\geq 30$ g/d in men ; $\geq 20$ g/d in women | Yes                                          | US                                         | 349        | 165/184       | 51                                                | 27                  | NR                  | 108              | 39/69                  | 31                  |
| Riquelme et al, <sup>3</sup> 2009    | Chile   | Retrospective data, cross-sectional | Santiago, Chile                                      | Yes, $>20$ g/d                                     | HCV only                                     | US                                         | 832        | 554/278       | 49                                                | 28                  | 8                   | 195              | 126/69                 | 23                  |
| Das et al, <sup>4</sup> 2010         | India   | Prospective data, cross-sectional   | West Bengal, India—single gram panchayat             | Yes, any use                                       | Yes                                          | US plus CT attenuation index $\leq -14$ HU | 1911       | 893/1018      | 36                                                | 20                  | 13                  | 164              | 76/88                  | 9                   |
| Zhang et al, <sup>5</sup> 2011       | China   | Prospective data, cross-sectional   | Jilin province, China                                | Yes, $>40$ g/d                                     | No                                           | US                                         | 3583       | 2068/1515     | Age 18–39 y: 32%; age 40–65y: 60%; age $>64$ : 7% | NR                  | 17                  | 626              | 403/223                | 17                  |
| Amirkalali et al, <sup>6</sup> 2014  | Iran    | Prospective data, cross-sectional   | Amol cohort                                          | Yes, $>30$ g/d in men, $>20$ g/d in women          | Yes                                          | US                                         | 5023       | 2175/2848     | 45                                                | NR                  | 30                  | 2199             | 996/1203               | 44                  |
| Bai et al, <sup>7</sup> 2014         | Taiwan  | Prospective data, cross-sectional   | Third National Nutrition and Health Survey in Taiwan | Yes, $>30$ g/wk men, $>20$ g/wk women              | Yes                                          | ALT $>35$ in men and ALT $>26$ in women    | 2186       | 1215/971      | 54                                                | 24                  | 9                   | 313              | 179/134                | 14                  |

Supplementary Table 1. Continued

| Study                                | Country       | Study design                        | Study sample                                                             | Baseline population excluded alcohol use    | Baseline population excluded viral hepatitis | NAFLD diagnosis method | Overall, n | Women/ men, n | Age, mean, median, or range, y | BMI, mean, kg/m <sup>2</sup> | IGT or type 2 DM, % | NAFLD overall, n | NAFLD in women /men, n | NAFLD prevalence, % |
|--------------------------------------|---------------|-------------------------------------|--------------------------------------------------------------------------|---------------------------------------------|----------------------------------------------|------------------------|------------|---------------|--------------------------------|------------------------------|---------------------|------------------|------------------------|---------------------|
| Huang et al, <sup>8</sup> 2012       | China         | Prospective data, cross-sectional   | All adults from Jiading district age>40                                  | Yes, >140 g/wk men, >70 g/wk women          | Yes                                          | US                     | 8632       | 5954/2678     | 59                             | 25                           | 18                  | 2590             | 1778/812               | 30                  |
| Chan et al, <sup>9</sup> 2015        | China         | Retrospective data, cross-sectional | Hong Kong                                                                | Yes, >140 g/wk men; >70 g/wk women          | Yes                                          | H MRS with IHTG ≥5%    | 793        | 463/330       | 48                             | 23                           | 4                   | 220              | 102/118                | 28                  |
| Ostovaneh et al, <sup>10</sup> 2015  | Iran          | Prospective data, cross-sectional   | Amol region and Zahedan                                                  | Yes, >20 g/d                                | Yes                                          | US                     | 7723       | 3494/4229     | 40                             | 27                           | 11                  | 3077             | 1454/1623              | 40                  |
| Pan et al, <sup>11</sup> 2015        | United States | Prospective data, cross-sectional   | Cameron county Hispanic cohort                                           | Yes, >20 g/d                                | Yes                                          | US                     | 442        | 290/152       | 49                             | 31                           | 22                  | 230              | 156/74                 | 52                  |
| Fattahi et al, <sup>12</sup> 2016    | Iran          | Retrospective data, cross-sectional | Kavar cohort study                                                       | Yes, any use                                | Yes                                          | US                     | 2980       | 2116/864      | 41                             | NR                           | NR                  | 864              | 579/285                | 29                  |
| Li et al, <sup>13</sup> 2016         | China         | Prospective data, cross-sectional   | Weifang, Shandong Province, China, randomly selected adults ages 45–60 y | Yes, >20 g/d men, >10 g/d women             | No                                           | US                     | 1006       | 537/469       | 51                             | 24                           | NR                  | 348              | 101/247                | 35                  |
| Majumdar et al, <sup>14</sup> 2016   | India         | Prospective data, cross-sectional   | Ballabgarh, India, age ≥35 y                                             | Yes, ≥20 g/d or ≥140 g/wk for >1 y          | Yes                                          | US                     | 176        | 143/33        | 54 in NAFLD; 52 in non-NAFLD   | 23                           | 5                   | 54               | 43/11                  | 31                  |
| Jinjuvadia et al, <sup>15</sup> 2017 | United States | Retrospective data, cross-sectional | NHANES III                                                               | Yes, >21 drinks/wk men, >14 drinks/wk women | Yes                                          | US                     | 11674      | 6471/5203     | 42                             | NR                           | 12                  | 2113             | 1010/1103              | 18                  |

|                                   |                  |                                               |                      |                                           |     |                                                                               |        |               |                                     |                                     |    |      |          |    |
|-----------------------------------|------------------|-----------------------------------------------|----------------------|-------------------------------------------|-----|-------------------------------------------------------------------------------|--------|---------------|-------------------------------------|-------------------------------------|----|------|----------|----|
| Zhai et al, <sup>16</sup><br>2017 | China            | Retrospective<br>data,<br>cross-<br>sectional | SPECT China<br>study | Yes, >20 g/<br>d men, >10<br>g/d<br>women | Yes | US                                                                            | 2011   | 1486/<br>525  | 55                                  | 24                                  | 11 | 824  | 610/214  | 41 |
| Shen et al, <sup>26</sup>         | United<br>States | Retrospective<br>data,<br>cross-<br>sectional | NHANES<br>2001–2006  | Yes                                       | Yes | ALT >40 U/L<br>or<br>AST >37 U/L<br>in men; ALT<br>or AST >31<br>U/L in women | 10,398 | 5717/<br>4681 | 43 in NAFLD;<br>45 in non-<br>NAFLD | 30 in NAFLD/<br>29 in non-<br>NAFLD | 9  | 2058 | 696/1362 | 20 |

NOTE. Retrospective data indicate retrospectively reviewed data, prospective data indicate prospectively collected data.

ALT, alanine aminotransferase; BMI, body mass index; CT, computed tomography; HCV, hepatitis C virus; HMRS, proton magnetic resonance spectrography; HU, Hounsfield unit; IGT, impaired glucose tolerance; IHTG, intrahepatic triglyceride content; NAFLD, nonalcoholic fatty liver disease; NHANES, National Health and Nutrition Examination Survey; NR, not reported; Type 2 DM, type 2 diabetes; US, ultrasound.

**Supplementary Table 2.** Included Studies Reporting NASH Prevalence Among Patients With Biopsy-Proven NAFLD

| Study                                  | Country       | Study design                        | Study sample                                                                                                                                                                                                                      | Overall sample with NAFLD, n | Women/men with NAFLD, n | Age, mean, median, or range, y   | Mean BMI, kg/m <sup>2</sup>      | IGT or DM, % | NASH, overall, n | NASH, women/men, n | NASH prevalence, % |
|----------------------------------------|---------------|-------------------------------------|-----------------------------------------------------------------------------------------------------------------------------------------------------------------------------------------------------------------------------------|------------------------------|-------------------------|----------------------------------|----------------------------------|--------------|------------------|--------------------|--------------------|
| Haukel and et al, <sup>17</sup> 2005   | Norway        | Prospective data, cross-sectional   | Consecutive patients referred to hepatology clinic with suspected NAFLD (ALT >50 plus US/CT hepatic steatosis or ALT >70, either for >6 mo) were offered liver biopsy, multicenter (n = 88 representing 68% of eligible patients) | 83                           | 37/46                   | 45                               | 31                               | 49           | 41               | 18/23              | 49                 |
| de Ledinghen et al, <sup>18</sup> 2004 | France        | Retrospective data, cross-sectional | Retrospectively identified consecutive patients referred to liver clinic with unexplained ALT increase × 6 mo and underwent liver biopsy, single center (n = 67)                                                                  | 67                           | 22/45                   | 47                               | 26                               | NR           | 27               | 6/21               | 40                 |
| Yamauchi et al, <sup>19</sup> 2004     | Japan         | Retrospective data, cross-sectional | Retrospectively identified patients with biopsy-proven NAFLD from pathology registry, single center (n = 38)                                                                                                                      | 38                           | 14/24                   | 50 among non-NASH; 45 among NASH | NR                               | 21           | 20               | 7/13               | 53                 |
| Arun et al, <sup>20</sup> 2006         | United States | Retrospective data, cross-sectional | Retrospectively identified consecutive patients who had undergone liver biopsy at time of bariatric surgery, single center (n = 365)                                                                                              | 280                          | 227/53                  | 41                               | NR                               | 39           | 130              | 95/35              | 46                 |
| Kichian et al, <sup>21</sup> 2003      | Canada        | Retrospective data, cross-sectional | Retrospectively identified patients had undergone liver biopsy for evaluation of abnormal liver enzyme levels from pathology registry, single center (n = 49)                                                                     | 49                           | 24/25                   | 46                               | NR                               | 27           | 36               | 18/18              | 73                 |
| Harrison et al, <sup>22</sup> 2008     | United States | Retrospective data, cross-sectional | Retrospectively identified patients with biopsy-proven NAFLD from pathology registry, multicenter (n = 827)                                                                                                                       | 827                          | 425/402                 | 49                               | NR                               | 35           | 669              | 363/306            | 81                 |
| Hossain et al, <sup>23</sup> 2009      | United States | Retrospective data, cross-sectional | Retrospectively identified patients with biopsy-proven NAFLD from pathology registry, single center (n = 432)                                                                                                                     | 432                          | 333/99                  | 44                               | 46                               | 25           | 116              | 70/46              | 27                 |
| Kashyap et al, <sup>24</sup> 2009      | United States | Prospective data, cross-sectional   | Consecutive patients undergoing laparoscopic bariatric surgery underwent liver biopsy at the same time as surgery, single center (n = 142)                                                                                        | 99                           | 75/24                   | 49                               | 48                               | 39           | 66               | 52/14              | 61                 |
| Malik et al, <sup>25</sup> 2009        | United States | Prospective data, cross-sectional   | Consecutive patients attending a hepatology clinic with biopsy-proven NAFLD, single center (n = 95)                                                                                                                               | 95                           | 37/58                   | 49                               | 30 among non-NASH; 35 among NASH | 27           | 60               | 24/36              | 63                 |

|                                          |                |                                     |                                                                                                                                                               |      |         |                 |    |     |     |         |    |
|------------------------------------------|----------------|-------------------------------------|---------------------------------------------------------------------------------------------------------------------------------------------------------------|------|---------|-----------------|----|-----|-----|---------|----|
| Rafiq et al, <sup>26</sup><br>2009       | United States  | Retrospective data, cross-sectional | Retrospectively identified patients with biopsy-proven NAFLD from a research registry, multicenter (n = 173)                                                  | 173  | 104/69  | 50              | 34 | 29  | 72  | 50/22   | 42 |
| Argentou et al, <sup>27</sup><br>2009    | Greece         | Prospective data, cross-sectional   | Consecutive patients undergoing biopancreatic diversion surgery had liver biopsy performed at time of surgery, single center (n = 50)                         | 41   | 26/15   | 39              | 56 | 36  | 10  | 4/6     | 24 |
| Prashanth et al, <sup>28</sup><br>2009   | India          | Prospective data, cross-sectional   | Type 2 diabetes patients with NAFLD detected on screening ultrasound were offered liver biopsy, single center (n = 90, representing 90% of eligible patients) | 72   | 47/25   | 54              | 26 | 100 | 52  | 32/20   | 72 |
| Williams et al, <sup>29</sup><br>2011    | United States  | Prospective data, cross-sectional   | Consecutive patients with ultrasound-detected NAFLD were offered liver biopsy, single center (n = 306, representing 93% of eligible patients)                 | 151  | 62/89   | 55              | 30 | 26  | 40  | 14/26   | 26 |
| Fracanzani et al, <sup>30</sup><br>2011  | Italy          | Retrospective data, cross-sectional | Retrospectively identified patients with biopsy-proven NAFLD in a research registry, multicenter (n = 431)                                                    | 431  | 71/360  | Reported as <50 | NR | 9   | 257 | 49/208  | 60 |
| Yasui et al, <sup>31</sup><br>2011       | Japan          | Retrospective data, cross-sectional | Retrospectively identified patients with biopsy-proven NAFLD from pathology registry, multicenter (n = 174)                                                   | 174  | 72/102  | 54              | 26 | 31  | 92  | 47/45   | 53 |
| Bambha et al, <sup>32</sup><br>2012      | United States  | Retrospective data, cross-sectional | Retrospectively identified patients with biopsy-proven NAFLD in research registry, multicenter NASH CRN registry (n = 1026)                                   | 1026 | 649/377 | 50              | 34 | 37  | 628 | 427/201 | 61 |
| Alam et al, <sup>33</sup><br>2013        | Bangladesh     | Retrospective data, cross-sectional | Retrospectively identified consecutive hepatology clinic patients with biopsy-proven NAFLD, single center (n = 177)                                           | 177  | 104/73  | 40              | NR | 22  | 75  | 44/31   | 42 |
| Stepanova et al, <sup>34</sup><br>2013   | United States  | Retrospective data, cross-sectional | Retrospectively identified patients with biopsy-proven NAFLD in a research registry, multicenter (n = 289)                                                    | 289  | 175/114 | 50              | 33 | 26  | 171 | 116/55  | 59 |
| Subramanian et al, <sup>35</sup><br>2013 | United Kingdom | Retrospective data, cross-sectional | Retrospective review of a prospective cohort of patients with biopsy-proven NAFLD in a research registry, single center (n = 141)                             | 141  | 53/88   | 52              | 29 | NR  | 118 | 43/75   | 84 |
| Goh et al, <sup>36</sup><br>2016         | United States  | Prospective data, cross-sectional   | Consecutive patients attending hepatology clinics with biopsy-proven NAFLD, multicenter (n = 405)                                                             | 405  | 227/178 | 48              | 35 | 42  | 291 | 164/127 | 72 |

---

**Supplementary Table 2.** Continued

| Study                             | Country     | Study design                                                         | Study sample                                                                                                                                                                                                                                 | Overall sample with NAFLD, n | Women/ men with NAFLD, n | Age, mean, median, or range, y | Mean BMI, $kg/m^2$ | IGT or type 2 DM, % | NASH, overall, n | NASH, women/ men, n | NASH prevalence, % |
|-----------------------------------|-------------|----------------------------------------------------------------------|----------------------------------------------------------------------------------------------------------------------------------------------------------------------------------------------------------------------------------------------|------------------------------|--------------------------|--------------------------------|--------------------|---------------------|------------------|---------------------|--------------------|
| Koo et al, <sup>37</sup> 2017     | South Korea | Prospective, cohort study (baseline cross-sectional data abstracted) | Consecutive subjects with $\geq 2$ metabolic syndrome components or evidence of insulin resistance and/or clinically suspected NASH or fibrosis were offered liver biopsy (n = 309; proportion of eligible patients not reported by authors) | 240                          | 123/117                  | 53                             | 27                 | 33                  | 123              | 71/52               | 51                 |
| Machado et al, <sup>38</sup> 2012 | Portugal    | Prospective data, cross-sectional                                    | Consecutive patients undergoing bariatric surgery had liver biopsy performed at time of surgery (n = 148)                                                                                                                                    | 148                          | 124/24                   | 42                             | 46                 | 26                  | 37               | 31/6                | 25                 |

NOTE. Retrospective data indicates retrospectively reviewed data, and prospective data indicates prospectively collected data.

ALT, alanine aminotransferase; BMI, body mass index; CT, computed tomography; NAFLD, nonalcoholic fatty liver disease; NASH, nonalcoholic steatohepatitis; NR, not reported; IGT, impaired glucose tolerance; type 2 DM, type 2 diabetes; US, ultrasound.

**Supplementary Table 3.** Included Studies Reporting Advanced Fibrosis Prevalence Among Patients With Biopsy-Proven NAFLD

| Study                                  | Country       | Study design                        | Study sample                                                                                                                                                                                                         | Advanced fibrosis definition | Overall sample with NAFLD, n | Women/ men with NAFLD, n | Age, mean, median, or range, y | Mean BMI, kg/m <sup>2</sup> | IGT or type 2 DM, % | Advanced fibrosis overall, n | Advanced fibrosis, women / men, n | Advanced fibrosis prevalence, % |
|----------------------------------------|---------------|-------------------------------------|----------------------------------------------------------------------------------------------------------------------------------------------------------------------------------------------------------------------|------------------------------|------------------------------|--------------------------|--------------------------------|-----------------------------|---------------------|------------------------------|-----------------------------------|---------------------------------|
| Park et al, <sup>39</sup> 2004         | South Korea   | Retrospective data, cross-sectional | Retrospectively identified patients with biopsy-proven NAFLD from pathology database, single center (n = 43)                                                                                                         | Fibrosis stages 3–4          | 43                           | 9/34                     | 33                             | 27                          | 7                   | 7                            | 3/4                               | 16                              |
| de Ledinghen et al, <sup>18</sup> 2004 | France        | Retrospective data, cross-sectional | Retrospectively identified consecutive patients referred to liver clinic with unexplained ALT increase × 6 mo and underwent liver biopsy, single center (n = 67)                                                     | Fibrosis stages 2–4          | 67                           | 22/45                    | 47                             | 26                          | NR                  | 20                           | 7/13                              | 30                              |
| Suzuki et al, <sup>40</sup> 2005       | United States | Retrospective data, cross-sectional | Consecutive untreated patients with biopsy-proven NAFLD presenting to a hepatology clinic, single center (n = 79)                                                                                                    | Fibrosis stages 3–4          | 79                           | 49/30                    | 53                             | 31                          | NR                  | 20                           | 13/7                              | 25                              |
| Ong et al, <sup>41</sup> 2005          | United States | Prospective data, cross-sectional   | Consecutive patients undergoing bariatric surgery had liver biopsy performed at time of surgery, single center (n = 212)                                                                                             | Fibrosis stages 3–4          | 197                          | 157/40                   | 42                             | 48                          | 24                  | 17                           | 11/6                              | 9                               |
| Hashimoto et al, <sup>42</sup> 2005    | Japan         | Retrospective data, cross-sectional | Retrospectively identified patients with biopsy-proven NAFLD from pathology database, single center (n = 247)                                                                                                        | Fibrosis stages 3–4          | 247                          | 117/130                  | 53                             | NR                          | 55                  | 89                           | 50/39                             | 36                              |
| Arun et al, <sup>20</sup> 2006         | United States | Retrospective data, cross-sectional | Retrospectively identified consecutive patients who had undergone liver biopsy at time of bariatric surgery, single center (n = 365)                                                                                 | Fibrosis stages 3–4          | 280                          | 227/53                   | 41                             | NR                          | 39                  | 28                           | 22/6                              | 10                              |
| Malik et al, <sup>43</sup> 2007        | Malaysia      | Prospective data, cross-sectional   | Consecutive patients with persistently increased liver enzyme levels and/or US-detected hepatic steatosis were offered liver biopsy, single center (n = 70; proportion of eligible patients not reported by authors) | Fibrosis stages 3–4          | 70                           | 33/37                    | 47                             | 28                          | 39                  | 18                           | 5/13                              | 26                              |

**Supplementary Table 3.** Continued

| Study                                 | Country       | Study design                        | Study sample                                                                                                                                                                                                      | Advanced fibrosis definition | Overall sample with NAFLD, n | Women/ men with NAFLD, n | Age, mean, median, or range, y | Mean BMI, kg/m <sup>2</sup> | IGT or type 2 DM, % | Advanced fibrosis overall, n | Advanced fibrosis, women / men, n | Advanced fibrosis prevalence, % |
|---------------------------------------|---------------|-------------------------------------|-------------------------------------------------------------------------------------------------------------------------------------------------------------------------------------------------------------------|------------------------------|------------------------------|--------------------------|--------------------------------|-----------------------------|---------------------|------------------------------|-----------------------------------|---------------------------------|
| Harrison et al, <sup>22</sup> 2008    | United States | Retrospective data, cross-sectional | Retrospectively identified patients with biopsy-proven NAFLD from pathology registry, multicenter (n = 827)                                                                                                       | Fibrosis stages 3–4          | 827                          | 425/402                  | 49                             | NR                          | 35                  | 182                          | 123/59                            | 22                              |
| Miyaaki et al, <sup>44</sup> 2008     | Japan         | Retrospective data, cross-sectional | Retrospectively identified patients with biopsy-proven NAFLD from pathology registry, multicenter (n = 182)                                                                                                       | Fibrosis stages 3–4          | 182                          | 108/74                   | 51                             | 27                          | 48                  | 32                           | 27/5                              | 18                              |
| Wong et al, <sup>45</sup> 2008        | Hong Kong     | Prospective data, cross-sectional   | Patients with clinical NAFLD and ALT increase for at least 12 weeks or features of metabolic syndrome were offered liver biopsy, single center (n = 162, proportion of eligible patients not reported by authors) | Fibrosis stages 3–4          | 162                          | 66/96                    | 46                             | 29                          | 57                  | 18                           | 6/12                              | 11                              |
| Hossain et al, <sup>23</sup> 2009     | United States | Retrospective data, cross-sectional | Retrospectively identified patients with biopsy-proven NAFLD from pathology registry, single center (n = 432)                                                                                                     | Fibrosis stages 2–4          | 432                          | 333/99                   | 44                             | 46                          | 25                  | 75                           | 50/25                             | 17                              |
| Fracanzani et al, <sup>30</sup> 2011  | Italy         | Retrospective data, cross-sectional | Retrospectively identified patients with biopsy-proven NAFLD in a research registry, multicenter (n = 431)                                                                                                        | Fibrosis stages 2–4          | 431                          | 71/360                   | <50                            | NR                          | 9                   | 130                          | 32/98                             | 30                              |
| Cichoż-Lach et al, <sup>46</sup> 2012 | Poland        | Prospective data, cross-sectional   | Consecutive patients with suspected NAFLD referred to hepatology clinic were offered liver biopsy, single center (n = 126, proportion of eligible patients not reported by authors)                               | Fibrosis stages 3–4          | 126                          | 53/73                    | 43                             | 29                          | 23                  | 27                           | 11/16                             | 21                              |
| Xun et al, <sup>47</sup> 2012         | China         | Retrospective data, cross-sectional | Consecutive patients with biopsy-proven NAFLD presenting to a hepatology clinic, single center (n = 152)                                                                                                          | Fibrosis stages 3–4          | 152                          | 31/121                   | 37                             | 26                          | 32                  | 24                           | 9/15                              | 16                              |



|                                       |                |                                     |                                                                                                                                   |                     |      |         |    |     |    |     |         |    |
|---------------------------------------|----------------|-------------------------------------|-----------------------------------------------------------------------------------------------------------------------------------|---------------------|------|---------|----|-----|----|-----|---------|----|
| Subramanian et al, <sup>35</sup> 2013 | United Kingdom | Retrospective data, cross-sectional | Retrospective review of a prospective cohort of patients with biopsy-proven NAFLD in a research registry, single center (n = 141) | Fibrosis stages 2–4 | 141  | 53/88   | 52 | 29  | NR | 74  | 33/41   | 52 |
| McPherson et al, <sup>48</sup> 2014   | Australia      | Retrospective data, cross-sectional | Retrospective review of patients with biopsy-proven NAFLD in a research registry, single center (n = 285)                         | Fibrosis stages 3–4 | 285  | 111/174 | 50 | 34  | 39 | 55  | 34/21   | 19 |
| Nakahara et al, <sup>49</sup> 2014    | Japan          | Retrospective data, cross-sectional | Retrospective review of patients with biopsy-proven NAFLD in a research registry, multicenter (n = 1365)                          | Fibrosis stages 3–4 | 1365 | 656/709 | 51 | 28  | 47 | 303 | 185/118 | 22 |
| Bambha et al, <sup>50</sup> 2014      | United States  | Retrospective data, cross-sectional | Retrospective review of patients with biopsy-proven NAFLD in a research registry, multicenter NASH-CRN (n = 782)                  | Fibrosis stages 3–4 | 782  | 487/295 | 48 | 34  | 24 | 199 | 137/62  | 25 |
| Jun et al, <sup>51</sup> 2017         | South Korea    | Retrospective data, cross-sectional | Retrospectively identified patients with biopsy-proven NAFLD from pathology registry, multicenter (n = 328)                       | Fibrosis stages 3–4 | 328  | 96/232  | 36 | 29  | 33 | 60  | 20/40   | 18 |
| Petta et al, <sup>52</sup> 2017       | Italy          | Retrospective data, cross-sectional | Retrospective review of patients with biopsy-proven NAFLD in a research registry, single center (n = 225)                         | Fibrosis stages 3–4 | 225  | 84/141  | 48 | 30  | NR | 71  | 41/30   | 32 |
| Atay et al, <sup>53</sup> 2017        | Turkey         | Retrospective data, cross-sectional | Retrospective review of patients with biopsy-proven NAFLD in a research registry, single center (n = 40)                          | Fibrosis stages 2–4 | 23   | 11/12   | 56 | ≥30 | 53 | 17  | 10/7    | 74 |

NOTE. Retrospective data indicates retrospectively reviewed data, and prospective data indicates prospectively collected data.

ALT, alanine aminotransferase; BMI, body mass index; CRN, Clinical Research Network; IGT, impaired glucose tolerance; NAFLD, nonalcoholic fatty liver disease; NR, not reported; type 2 DM, type 2 diabetes; US, ultrasound.

**Supplementary Table 4.** Quality Assessment for Included Studies

| Study             | 1   | 2   | 3   | 4   | 5   | 6   | 7   | 8   | 9   | 10 | 11  | 12  | 13 | 14  | Score | Outcome             |
|-------------------|-----|-----|-----|-----|-----|-----|-----|-----|-----|----|-----|-----|----|-----|-------|---------------------|
| Chen 2006         | Yes | Yes | No  | Yes | No  | No  | No  | No  | Yes | NA | Yes | Yes | NA | No  | 6     | NAFLD               |
| Zelber-Sagi 2007  | Yes | Yes | No  | Yes | No  | No  | No  | Yes | Yes | NA | Yes | Yes | NA | Yes | 8     | NAFLD               |
| Riquelme 2009     | Yes | Yes | Yes | Yes | No  | No  | No  | NA  | No  | NA | Yes | Yes | NA | NA  | 6     | NAFLD               |
| Das 2010          | Yes | Yes | Yes | Yes | No  | No  | No  | NA  | Yes | NA | Yes | Yes | NA | Yes | 8     | NAFLD               |
| Zhang 2011        | Yes | Yes | Yes | Yes | No  | No  | No  | NA  | Yes | NA | Yes | Yes | NA | NA  | 7     | NAFLD               |
| Amirkalali 2014   | Yes | Yes | Yes | Yes | No  | No  | No  | NA  | Yes | NA | Yes | Yes | NA | NA  | 7     | NAFLD               |
| Bai 2014          | Yes | Yes | CD  | Yes | No  | No  | No  | NA  | Yes | NA | Yes | Yes | NA | Yes | 7     | NAFLD               |
| Huang 2012        | Yes | Yes | Yes | Yes | No  | No  | No  | NA  | Yes | NA | Yes | Yes | NA | Yes | 8     | NAFLD               |
| Chan 2015         | Yes | Yes | CD  | Yes | No  | No  | No  | Yes | Yes | NA | Yes | Yes | NA | Yes | 8     | NAFLD               |
| Ostovaneh 2015    | Yes | Yes | Yes | Yes | No  | No  | No  | Yes | Yes | NA | Yes | Yes | NA | Yes | 9     | NAFLD               |
| Fattahi 2016      | Yes | Yes | Yes | Yes | No  | No  | No  | NA  | Yes | NA | Yes | Yes | NA | No  | 7     | NAFLD               |
| Li 2016           | Yes | Yes | Yes | Yes | No  | No  | No  | NA  | Yes | NA | Yes | Yes | NA | Yes | 8     | NAFLD               |
| Majumdar 2016     | Yes | Yes | Yes | Yes | Yes | No  | No  | NA  | No  | NA | Yes | Yes | NA | Yes | 8     | NAFLD               |
| Jinjuvidia 2017   | Yes | Yes | Yes | Yes | No  | No  | No  | No  | NA  | NA | Yes | Yes | NA | Yes | 7     | NAFLD               |
| Zhai 2017         | Yes | Yes | Yes | Yes | No  | No  | No  | No  | Yes | NA | Yes | Yes | NA | Yes | 8     | NAFLD               |
| Shen 2016         | Yes | Yes | Yes | Yes | No  | No  | No  | No  | Yes | NA | Yes | Yes | NA | Yes | 8     | NAFLD               |
| Pan 2015          | Yes | Yes | Yes | Yes | No  | No  | No  | No  | NA  | NA | Yes | Yes | NA | NA  | 6     | NAFLD               |
| Ong 2005          | Yes | Yes | Yes | Yes | No  | No  | No  | NA  | Yes | NA | Yes | Nr  | NA | Yes | 7     | Fibrosis            |
| Haukeland 2005    | Yes | Yes | Yes | Yes | No  | No  | No  | Yes | Yes | NA | Yes | Yes | NA | Yes | 9     | NASH                |
| de Ledinghen 2004 | Yes | No  | CD  | CD  | No  | No  | No  | NA  | Yes | NA | Yes | Yes | NA | No  | 4     | NASH, fibrosis      |
| Yamauchi 2004     | Yes | Yes | CD  | CD  | No  | No  | No  | No  | Yes | NA | Yes | Yes | NA | No  | 5     | NASH                |
| Arun 2006         | Yes | Yes | CD  | CD  | No  | No  | No  | No  | Yes | NA | Yes | Yes | NA | No  | 5     | NASH, fibrosis      |
| Kichian 2003      | Yes | Yes | CD  | CD  | No  | No  | No  | NA  | NA  | NA | Yes | Yes | NA | NA  | 4     | NASH                |
| Harrison 2008     | Yes | Yes | CD  | CD  | No  | No  | No  | NA  | Yes | NA | Yes | Yes | NA | Yes | 6     | NASH, fibrosis      |
| Hossain 2009      | Yes | No  | CD  | CD  | No  | No  | No  | NA  | Yes | NA | Yes | Yes | NA | Yes | 5     | NASH, fibrosis      |
| Kashyap 2009      | Yes | Yes | Yes | Yes | No  | No  | No  | No  | Yes | NA | Yes | Yes | NA | NA  | 6     | NASH                |
| Malik 2009        | Yes | Yes | Yes | Yes | No  | No  | No  | NA  | Yes | NA | Yes | Yes | NA | NA  | 8     | NASH                |
| Rafiq 2009        | Yes | Yes | CD  | CD  | No  | Yes | Yes | No  | Yes | NA | Yes | Yes | NR | Yes | 7     | NASH                |
| Argentou 2009     | Yes | Yes | Yes | Yes | No  | No  | No  | NA  | Yes | NA | Yes | Yes | NA | NA  | 7     | NASH                |
| Prashanth 2009    | Yes | Yes | Yes | Yes | No  | No  | No  | Yes | Yes | NA | Yes | Yes | NA | No  | 8     | NASH                |
| Williams 2011     | Yes | Yes | Yes | Yes | No  | No  | No  | NA  | Yes | NA | Yes | NR  | NA | Yes | 7     | NASH                |
| Francanzani 2011  | Yes | Yes | CD  | CD  | No  | No  | No  | NA  | Yes | NA | Yes | Yes | NA | Yes | 6     | NASH, fibrosis      |
| Yasui 2011        | Yes | Yes | CD  | CD  | No  | No  | No  | No  | Yes | NA | Yes | Yes | NA | Yes | 6     | NASH                |
| Alam 2013         | Yes | Yes | CD  | CD  | No  | No  | No  | NA  | Yes | NA | Yes | Yes | NA | Yes | 6     | NASH                |
| Goh 2016          | Yes | Yes | CD  | Yes | No  | No  | No  | NA  | Yes | NA | Yes | Yes | NA | NA  | 6     | NASH                |
| Koo 2017          | Yes | Yes | CD  | Yes | No  | No  | No  | NA  | Yes | NA | Yes | Yes | NA | Yes | 7     | NASH                |
| Machado 2012      | Yes | Yes | Yes | Yes | No  | No  | No  | NA  | NA  | NA | Yes | Yes | NA | Yes | 7     | NASH                |
| Park 2004         | Yes | Yes | CD  | No  | No  | No  | No  | No  | Yes | NA | Yes | Yes | NA | No  | 5     | Fibrosis stages 3–4 |
| Suzuki 2005       | Yes | No  | CD  | Yes | No  | No  | No  | Yes | Yes | NA | Yes | Yes | NA | Yes | 7     | Fibrosis stages 3–4 |
| Hashimoto 2005    | Yes | Yes | CD  | No  | No  | No  | CD  | No  | Yes | NA | Yes | Yes | NA | No  | 5     | Fibrosis stages 3–4 |
| Malik 2007        | Yes | Yes | CD  | Yes | No  | No  | No  | NA  | Yes | NA | Yes | Yes | NA | Yes | 7     | Fibrosis stages 3–4 |
| Miyaaki 2008      | Yes | No  | CD  | CD  | No  | No  | No  | NA  | Yes | NA | Yes | Yes | NA | Yes | 5     | Fibrosis stages 3–4 |
| McPherson 2014    | Yes | Yes | CD  | Yes | No  | No  | No  | NA  | NA  | NA | Yes | Yes | NA | NA  | 5     | Fibrosis stages 3–4 |
| Nakahara 2014     | Yes | Yes | CD  | CD  | No  | No  | No  | NA  | Yes | NA | Yes | Yes | NA | Yes | 6     | Fibrosis stages 3–4 |
| Bambha 2014       | Yes | Yes | CD  | CD  | No  | No  | No  | NA  | Yes | NA | Yes | Yes | NA | Yes | 6     | Fibrosis stages 3–4 |
| Jun 2017          | Yes | Yes | Yes | Yes | No  | No  | NA  | NA  | Yes | NA | Yes | Yes | NA | NA  | 7     | Fibrosis stages 3–4 |
| Xun 2012          | Yes | Yes | CD  | CD  | No  | No  | No  | NA  | NA  | NA | Yes | Yes | NA | NA  | 4     | Fibrosis stages 3–4 |
| Atay 2017         | Yes | CD  | CD  | Yes | No  | No  | No  | NA  | Yes | NA | Yes | Yes | NA | NA  | 5     | Fibrosis stages 2–4 |
| Wong 2008         | Yes | Yes | CD  | Yes | Yes | No  | No  | NA  | No  | NA | Yes | Yes | NA | NA  | 6     | Fibrosis stages 3–4 |
| Petta 2017        | Yes | Yes | CD  | CD  | No  | No  | No  | No  | Yes | NA | Yes | Yes | NA | Yes | 6     | Fibrosis stages 3–4 |
| Stepanova 2013    | Yes | Yes | CD  | CD  | No  | Yes | Yes | NA  | Yes | No | Yes | NR  | NR | Yes | 7     | NASH                |
| Malik 2009        | Yes | Yes | Yes | Yes | Yes | No  | No  | NA  | Yes | NA | Yes | Yes | NA | NA  | 8     | NASH                |

**Supplementary Table 4.** Continued

| Study            | 1   | 2   | 3   | 4   | 5  | 6  | 7  | 8   | 9   | 10 | 11  | 12  | 13 | 14  | Score | Outcome                   |
|------------------|-----|-----|-----|-----|----|----|----|-----|-----|----|-----|-----|----|-----|-------|---------------------------|
| Subramaniam 2013 | Yes | Yes | CD  | CD  | No | No | No | Yes | Yes | NA | Yes | Yes | NA | Yes | 7     | NASH, fibrosis stages 2–4 |
| Bambha 2012      | Yes | Yes | Yes | Yes | No | No | No | NA  | Yes | NA | Yes | Yes | NA | Yes | 8     | NASH                      |
| Cichoż-Lach 2012 | Yes | Yes | CD  | Yes | No | No | No | NA  | NA  | NA | Yes | NR  | NA | NA  | 4     | Fibrosis stages 3–4       |

NOTE. The National Institutes of Health Quality Assessment Tool for Observational Cohort and Cross-sectional Studies 14 questions are as follows:

1. Was the research question or objective clearly stated?
2. Was the study population clearly specified and defined?
3. Was the participation rate of eligible persons at least 50%?
4. Were all the subjects selected or recruited from the same or similar populations (including the same time period)?
5. Was a sample size justification, power description, or variance and effect estimates provided?
6. For the analyses in this paper, were the exposure(s) of interest measured prior to the outcome(s) being measured?
7. Was the time frame sufficient so that one could reasonably expect to see an association between exposure and outcome if it existed?
8. For exposures that can vary in amount or level, did the study examine different levels of the exposure as related to the outcome?
9. Were the exposure measures (independent variables) clearly defined, valid, reliable, and implemented consistently across all study participants?
10. Was the exposure(s) assessed more than once over time?
11. Were the outcome measures (dependent variables) clearly defined, valid, reliable, and implemented consistently across all study participants?
12. Were the outcome assessors blinded to the exposure status of participants?
13. Was loss to follow-up evaluation after baseline 20% or less?
14. Were key potential confounding variables measured and adjusted statistically for their impact on the relationship?

CD, cannot determine; NA, not applicable; NAFLD, nonalcoholic fatty liver disease; NASH, nonalcoholic steatohepatitis.
